# Supplementary material
Source: MDPI journal article supplement (https://www.mdpi.com/2227-9717/10/12/2611)
Supplement: s1 [file s1]

# A Novel Method to Detoxify Steam Exploded Biomass and Produce a Substrate for Biorefinery

Francesco Zimbardi \*, Egidio Viola, G. Arcieri, Vito Valerio, and Massimo Carnevale

## Detoxification with the Pilot scale Vibro-fluidized bed system: detailed data by DOE

**Table S1.** Experimental responses at different conditions

| Exp # | Ur,% | t,min | DM,% | Acetic acid,<br>% | Furfural,<br>ppm | 5-HMF,<br>ppm | Total inhibitors,<br>% | Enzymatic hydrolysis<br>yield, % |
|-------|------|-------|------|-------------------|------------------|---------------|------------------------|----------------------------------|
| 1     | 80   | 50    | 83.5 | 0.079             | 29               | 537           | 0.136                  | 80.6                             |
| 2     | 60   | 10    | 81.5 | 0.379             | 60               | 433           | 0.428                  | 88.2                             |
| 3     | 60   | 50    | 84.1 | 0.166             | 36               | 366           | 0.206                  | 83.6                             |
| 4     | 40   | 30    | 94.7 | 0.155             | 43               | 391           | 0.198                  | 81.1                             |
| 5     | 80   | 30    | 87.5 | 0.049             | 32               | 433           | 0.096                  | 85.7                             |
| 6     | 80   | 10    | 70.8 | 0.323             | 42               | 540           | 0.381                  | 85.7                             |
| 7     | 40   | 10    | 92.6 | 0.35              | 69               | 592           | 0.416                  | 85.6                             |
| 8     | 60   | 30    | 93.2 | 0.11              | 36               | 576           | 0.171                  | 88.8                             |
| 9     | 40   | 50    | 94.9 | 0.155             | 64               | 598           | 0.375                  | 86.2                             |
| 10    | 60   | 30    | 95.5 | 0.11              | 35               | 591           | 0.172                  | 84.3                             |

Design-Expert® Software  
Factor Coding: Actual  
Acetic acid (%)

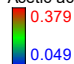

X1 = A: Ur  
X2 = B: t

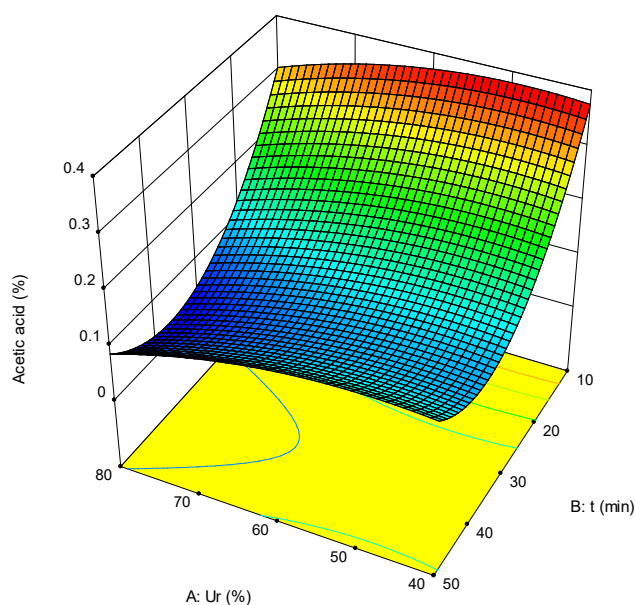

**Figure S1.** Acetic acid in the detoxified pulp with the pilot vibro-fluidized bed at different treatment conditions.

Design-Expert® Software  
Factor Coding: Actual  
Furfural (ppm)

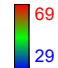

X1 = A: Ur  
X2 = B: t

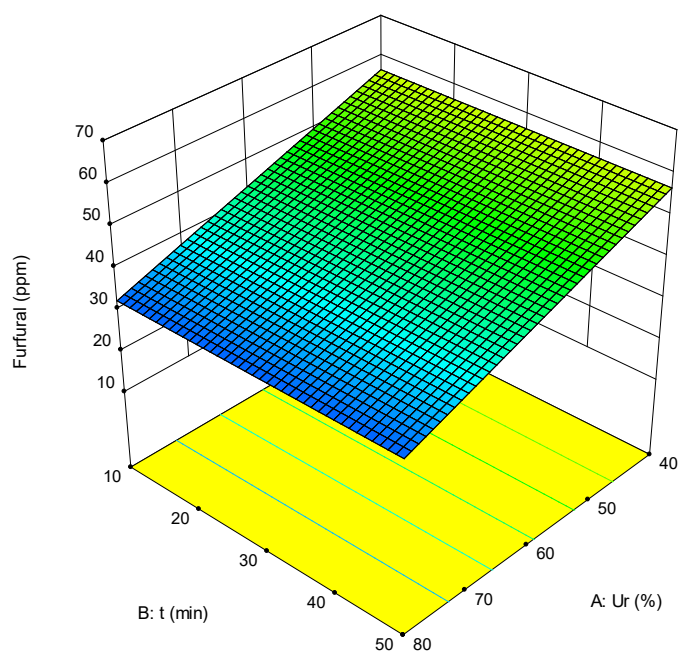

**Figure S2.** Furfural in the detoxified pulp with the pilot vibro-fluidized bed at different treatment conditions.

Design-Expert® Software  
Factor Coding: Actual  
5-HMF (ppm)

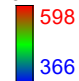

X1 = A: Ur  
X2 = B: t

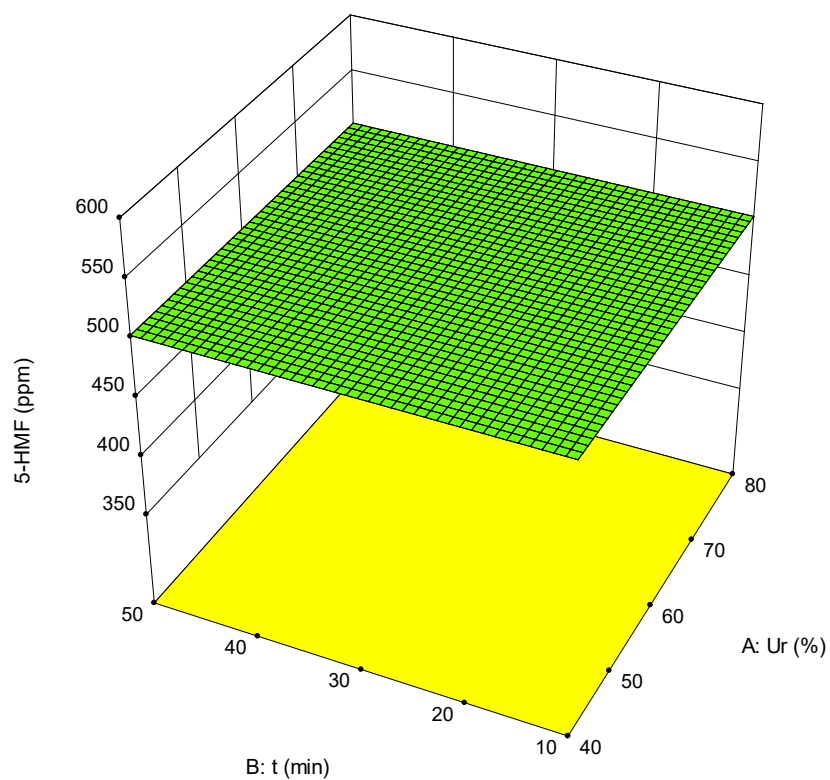

**Figure S3.** 5-HMF in the detoxified pulp with the pilot vibro-fluidized bed at different treatment conditions.

Design-Expert® Software  
 Factor Coding: Actual  
 Enzymatic hydrolysis yield (%)

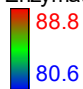

X1 = A: Ur  
 X2 = B: t

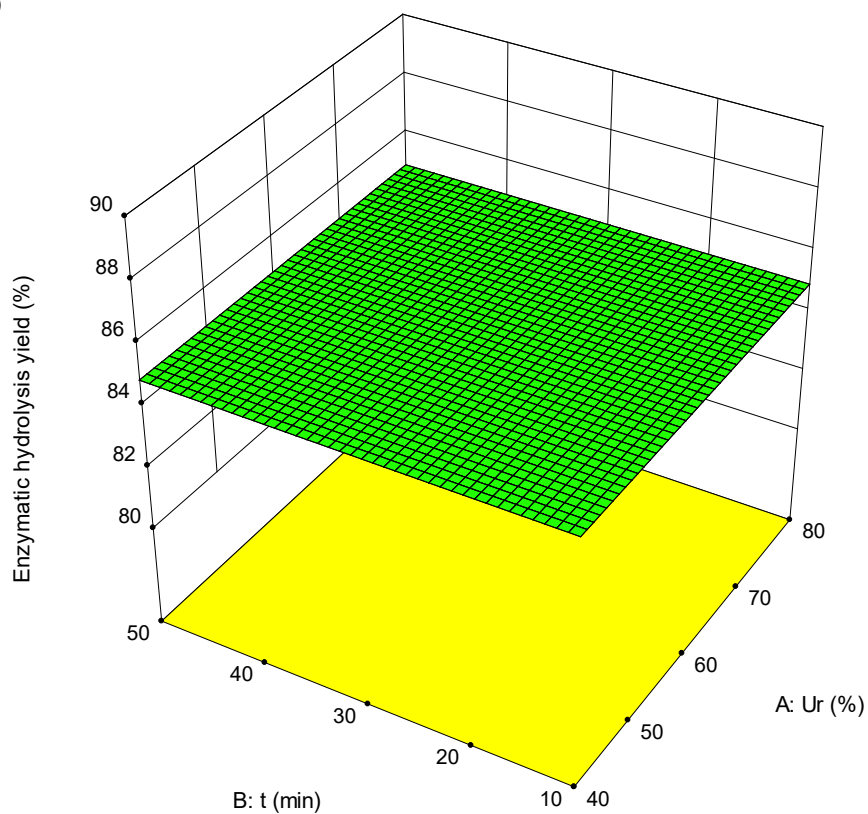

Design-Expert® Software  
 Factor Coding: Actual  
 Enzymatic hydrolysis yield (%)  
 --- 95% CI Bands

Actual Factors  
 A: Ur = 60  
 B: t = 30

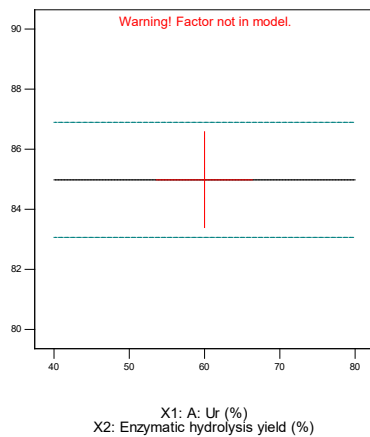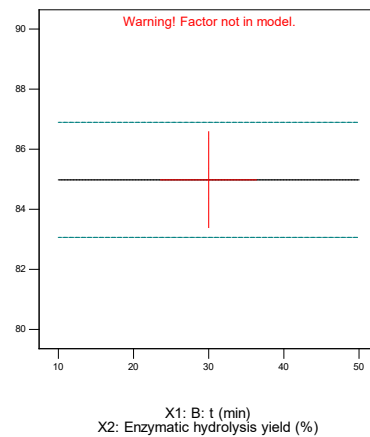

**Figure S4.** Predicted EH yield (%) on the detoxified pulp at different treatment conditions..

Table S2. ANOVA for DM

| ANOVA for Response Surface Reduced Quadratic model             |                |    |             |         |                  |                 |
|----------------------------------------------------------------|----------------|----|-------------|---------|------------------|-----------------|
| Analysis of variance table [Partial sum of squares - Type III] |                |    |             |         |                  |                 |
| Source                                                         | Sum of Squares | df | Mean Square | F Value | p-value Prob > F |                 |
| <b>Model</b>                                                   | 431.77         | 2  | 215.88      | 10.90   | 0.0071           | significant     |
| <b>A-Ur</b>                                                    | 272.03         | 1  | 272.03      | 13.73   | 0.0076           |                 |
| <b>B<sup>2</sup></b>                                           | 159.74         | 1  | 159.74      | 8.06    | 0.0251           |                 |
| <b>Residual</b>                                                | 138.69         | 7  | 19.81       |         |                  |                 |
| <b>Lack of Fit</b>                                             | 136.05         | 6  | 22.67       | 8.57    | 0.2557           | not significant |
| <b>Pure Error</b>                                              | 2.64           | 1  | 2.64        |         |                  |                 |
| <b>Cor Total</b>                                               | 570.46         | 9  |             |         |                  |                 |

Table S3. Coefficients for DM

| Coefficient          |          | Standard |       | 95% CI |       | VIF  |
|----------------------|----------|----------|-------|--------|-------|------|
| Factor               | Estimate | df       | Error | Low    | High  |      |
| <b>Intercept</b>     | 92.72    | 1        | 2.23  | 87.46  | 97.99 |      |
| <b>A-Ur</b>          | -6.73    | 1        | 1.82  | -11.03 | -2.44 | 1.00 |
| <b>B<sup>2</sup></b> | -8.16    | 1        | 2.87  | -14.95 | -1.36 | 1.00 |

Table S4. ANOVA for Inhibitors

| ANOVA for Response Surface Reduced Quadratic model             |                |    |             |         |                  |             |
|----------------------------------------------------------------|----------------|----|-------------|---------|------------------|-------------|
| Analysis of variance table [Partial sum of squares - Type III] |                |    |             |         |                  |             |
| Source                                                         | Sum of Squares | df | Mean Square | F Value | p-value Prob > F |             |
| <b>Model</b>                                                   | 0.14           | 4  | 0.035       | 55.02   | 0.0003           | significant |
| <b>A-Ur</b>                                                    | 0.024          | 1  | 0.024       | 36.56   | 0.0018           |             |
| <b>B-t</b>                                                     | 0.043          | 1  | 0.043       | 66.73   | 0.0004           |             |
| <b>AB</b>                                                      | 0.010          | 1  | 0.010       | 16.14   | 0.0101           |             |
| <b>B<sup>2</sup></b>                                           | 0.065          | 1  | 0.065       | 100.66  | 0.0002           |             |
| <b>Residual</b>                                                | 3.223E-003     | 5  | 6.445E-004  |         |                  |             |
| <b>Lack of Fit</b>                                             | 3.222E-003     | 4  | 8.056E-004  | 1611.13 | 0.0187           | significant |
| <b>Pure Error</b>                                              | 5.000E-007     | 1  | 5.000E-007  |         |                  |             |
| <b>Cor Total</b>                                               | 0.15           | 9  |             |         |                  |             |

Table S5. Coefficients for Inhibitors

| Coefficient          |          | Standard |       | 95% CI |        | VIF  |
|----------------------|----------|----------|-------|--------|--------|------|
| Factor               | Estimate | df       | Error | Low    | High   |      |
| <b>Intercept</b>     | 0.16     | 1        | 0.013 | 0.13   | 0.19   |      |
| <b>A-Ur</b>          | -0.063   | 1        | 0.010 | -0.089 | -0.036 | 1.00 |
| <b>B-t</b>           | -0.085   | 1        | 0.010 | -0.11  | -0.058 | 1.00 |
| <b>AB</b>            | -0.051   | 1        | 0.013 | -0.084 | -0.018 | 1.00 |
| <b>B<sup>2</sup></b> | 0.16     | 1        | 0.016 | 0.12   | 0.21   | 1.00 |

Table S6. ANOVA for Acetic acid

| ANOVA for Response Surface Reduced Quadratic model             |                |    |             |         |                  |             |
|----------------------------------------------------------------|----------------|----|-------------|---------|------------------|-------------|
| Analysis of variance table [Partial sum of squares - Type III] |                |    |             |         |                  |             |
| Source                                                         | Sum of Squares | df | Mean Square | F Value | p-value Prob > F |             |
| <b>Model</b>                                                   | 0.12           | 4  | 0.031       | 64.37   | 0.0002           | significant |
| <b>A-Ur</b>                                                    | 7.280E-003     | 1  | 7.280E-003  | 15.05   | 0.0116           |             |
| <b>B-t</b>                                                     | 0.071          | 1  | 0.071       | 146.46  | < 0.0001         |             |
| <b>A<sup>2</sup></b>                                           | 2.040E-003     | 1  | 2.040E-003  | 4.22    | 0.0952           |             |
| <b>B<sup>2</sup></b>                                           | 0.046          | 1  | 0.046       | 95.80   | 0.0002           |             |
| <b>Residual</b>                                                | 2.419E-003     | 5  | 4.837E-004  |         |                  |             |
| <b>Lack of Fit</b>                                             | 2.419E-003     | 4  | 6.047E-004  |         |                  |             |
| <b>Pure Error</b>                                              | 0.000          | 1  | 0.000       |         |                  |             |
| <b>Cor Total</b>                                               | 0.13           | 9  |             |         |                  |             |

Table S7. Coefficients for Acetic acid

| Coefficient          |          | Standard |            | 95% CI |            | VIF  |
|----------------------|----------|----------|------------|--------|------------|------|
| Factor               | Estimate | df       | Error      | Low    | High       |      |
| <b>Intercept</b>     | 0.12     | 1        | 0.013      | 0.087  | 0.15       |      |
| <b>A-Ur</b>          | -0.035   | 1        | 8.979E-003 | -0.058 | -0.012     | 1.00 |
| <b>B-t</b>           | -0.11    | 1        | 8.979E-003 | -0.13  | -0.086     | 1.00 |
| <b>A<sup>2</sup></b> | -0.030   | 1        | 0.014      | -0.067 | 7.441E-003 | 1.03 |
| <b>B<sup>2</sup></b> | 0.14     | 1        | 0.014      | 0.10   | 0.18       | 1.03 |

Table S8. ANOVA for furfural

| ANOVA for Response Surface Reduced Linear model                |                |    |             |         |                  |             |
|----------------------------------------------------------------|----------------|----|-------------|---------|------------------|-------------|
| Analysis of variance table [Partial sum of squares - Type III] |                |    |             |         |                  |             |
| Source                                                         | Sum of Squares | df | Mean Square | F Value | p-value Prob > F |             |
| <b>Model</b>                                                   | 888.17         | 1  | 888.17      | 7.31    | 0.0269           | significant |
| <b>A-Ur</b>                                                    | 888.17         | 1  | 888.17      | 7.31    | 0.0269           |             |
| <b>Residual</b>                                                | 972.23         | 8  | 121.53      |         |                  |             |
| <b>Lack of Fit</b>                                             | 971.73         | 7  | 138.82      | 277.64  | 0.0462           | significant |
| <b>Pure Error</b>                                              | 0.50           | 1  | 0.50        |         |                  |             |
| <b>Cor Total</b>                                               | 1860.40        | 9  |             |         |                  |             |

Table S9. Coefficients for Furfural

| Coefficient      |          | Standard |       | 95% CI |       | VIF  |
|------------------|----------|----------|-------|--------|-------|------|
| Factor           | Estimate | df       | Error | Low    | High  |      |
| <b>Intercept</b> | 44.60    | 1        | 3.49  | 36.56  | 52.64 |      |
| <b>A-Ur</b>      | -12.17   | 1        | 4.50  | -22.54 | -1.79 | 1.00 |

Table S10. ANOVA for 5-HMF

| ANOVA for Response Surface Mean model                          |                |    |             |         |         |                 |
|----------------------------------------------------------------|----------------|----|-------------|---------|---------|-----------------|
| Analysis of variance table [Partial sum of squares - Type III] |                |    |             |         |         |                 |
| Source                                                         | Sum of Squares | df | Mean Square | F Value | p-value |                 |
| <b>Model</b>                                                   | 0.000          | 0  |             |         |         |                 |
| <b>Residual</b>                                                | 73584.10       | 9  | 8176.01     |         |         |                 |
| <b>Lack of Fit</b>                                             | 73471.60       | 8  | 9183.95     | 81.64   | 0.0854  | not significant |
| <b>Pure Error</b>                                              | 112.50         | 1  | 112.50      |         |         |                 |
| <b>Cor Total</b>                                               | 73584.10       | 9  |             |         |         |                 |

Table S11. Coefficients for 5-HMF

|                  | Coefficient |    | Standard | 95% CI |        |
|------------------|-------------|----|----------|--------|--------|
| Factor           | Estimate    | df | Error    | Low    | High   |
| <b>Intercept</b> | 505.70      | 1  | 28.59    | 441.02 | 570.38 |

Table S12. ANOVA for EH

| ANOVA for Response Surface Mean model                          |                |    |             |         |         |                 |
|----------------------------------------------------------------|----------------|----|-------------|---------|---------|-----------------|
| Analysis of variance table [Partial sum of squares - Type III] |                |    |             |         |         |                 |
| Source                                                         | Sum of Squares | df | Mean Square | F Value | p-value |                 |
| <b>Model</b>                                                   | 0.000          | 0  |             |         |         |                 |
| <b>Residual</b>                                                | 64.48          | 9  | 7.16        |         |         |                 |
| <b>Lack of Fit</b>                                             | 54.35          | 8  | 6.79        | 0.67    | 0.7431  | not significant |
| <b>Pure Error</b>                                              | 10.13          | 1  | 10.13       |         |         |                 |
| <b>Cor Total</b>                                               | 64.48          | 9  |             |         |         |                 |

Table S13. Coefficients for EH

|                  | Coefficient |    | Standard | 95% CI |       |
|------------------|-------------|----|----------|--------|-------|
| Factor           | Estimate    | df | Error    | Low    | High  |
| <b>Intercept</b> | 84.98       | 1  | 0.85     | 83.07  | 86.89 |

Table S14. Coefficients table

| Response                          | Intercept | A          | B              | AB             | A^2        | B^2      |
|-----------------------------------|-----------|------------|----------------|----------------|------------|----------|
| <b>DM</b>                         | 92.725    | -6.73333   |                |                |            | -8.15833 |
| p=                                |           | 0.0076     |                |                |            | 0.0251   |
| <b>Inhibitors</b>                 | 0.15925   | -0.0626667 | -0.0846667     | -0.051         |            | 0.164417 |
| p=                                |           | 0.0018     | 0.0004         | 0.0101         |            | 0.0002   |
| <b>Acetic acid</b>                | 0.120786  | -0.0348333 | -0.108667      |                | -0.0295714 | 0.140929 |
| p=                                |           | 0.0116     | < 0.0001       |                | 0.0952     | 0.0002   |
| <b>Furfural</b>                   | 44.6      | -12.1667   |                |                |            |          |
| p=                                |           | 0.0269     |                |                |            |          |
| <b>5-HMF</b>                      | 505.7     |            |                |                |            |          |
| p=                                |           |            |                |                |            |          |
| <b>Enzymatic hydrolysis yield</b> | 84.98     |            |                |                |            |          |
| p=                                |           |            |                |                |            |          |
| <b>Legend</b>                     |           | p < .01    | .01 <= p < .05 | .05 <= p < .10 | p >= .10   |          |
